# Supplementary material for: TLE2 is associated with favorable prognosis and regulates cell growth and gemcitabine sensitivity in pancreatic cancer
Source: PubMed Central journal article supplement — Ann Transl Med. 2020 Aug;8(16):1017. doi: 10.21037/atm-20-5492 (PMC7475492; doi:10.21037/atm-20-5492), 2020-08
Supplement: atm-08-16-1017-supplementary.pdf [file atm-08-16-1017-supplementary.pdf]

## TOP 400 gens

|            |       |
|------------|-------|
| SMARCD3    | 0.803 |
| DPH1       | 0.776 |
| KIF12      | 0.768 |
| IPO5P1     | 0.754 |
| CRTC1      | 0.751 |
| CCDC106    | 0.741 |
| PCSK1N     | 0.733 |
| ZNF10      | 0.729 |
| SLC25A27   | 0.726 |
| ABHD14A    | 0.725 |
| CACNA2D2   | 0.725 |
| ZNF667-AS1 | 0.718 |
| ZNF467     | 0.713 |
| CA11       | 0.711 |
| SALL2      | 0.711 |
| TSPOAP1    | 0.709 |
| ZNF580     | 0.705 |
| AC139530.1 | 0.705 |
| BEX5       | 0.702 |
| NEURL4     | 0.702 |
| MIR3936    | 0.702 |
| CIRBP      | 0.701 |
| SLC29A4    | 0.701 |
| SAFB2      | 0.7   |
| SUOX       | 0.7   |
| SHC2       | 0.699 |
| SLC26A11   | 0.699 |
| RGS11      | 0.699 |
| GIPR       | 0.698 |
| SCAMP5     | 0.697 |
| OGFOD3     | 0.697 |
| AC008443.4 | 0.695 |
| HDAC5      | 0.692 |
| SGSM2      | 0.692 |
| TMEM88     | 0.69  |
| PXN-AS1    | 0.69  |
| KCNH2      | 0.689 |
| ZNF132     | 0.688 |
| FAM69B     | 0.687 |
| AC104825.1 | 0.687 |
| PRR36      | 0.687 |
| ATP6V0A1   | 0.686 |
| CFAP410    | 0.685 |
| ZSCAN18    | 0.685 |
| ZNF837     | 0.684 |
| BEX1       | 0.683 |
| COQ10A     | 0.683 |
| PDCL3P4    | 0.682 |
| MLXIPL     | 0.681 |
| PDZD4      | 0.681 |
| PRRT3      | 0.681 |
| ADGRL1     | 0.678 |
| AC068888.1 | 0.678 |
| CPT1C      | 0.676 |
| CORO2B     | 0.676 |
| ZER1       | 0.675 |
| MZF1       | 0.675 |

|             |       |
|-------------|-------|
| ASB16-AS1   | 0.673 |
| MTURN       | 0.671 |
| TBKBP1      | 0.671 |
| AL118558.3  | 0.671 |
| AC008124.1  | 0.671 |
| LINC01089   | 0.67  |
| MTERF2      | 0.669 |
| AL136295.6  | 0.669 |
| MIR3936HG   | 0.669 |
| RTL5        | 0.668 |
| CAMTA2      | 0.667 |
| AC090617.5  | 0.664 |
| CACNA1H     | 0.662 |
| SLC2A11     | 0.662 |
| DTX3        | 0.661 |
| TOM1L2      | 0.661 |
| POMT1       | 0.66  |
| NRSN2       | 0.659 |
| DPP7        | 0.658 |
| SSBP4       | 0.658 |
| PPP6R2      | 0.657 |
| EPOR        | 0.657 |
| FBRSL1      | 0.656 |
| AC024075.2  | 0.656 |
| FGF14-AS2   | 0.656 |
| ZNF554      | 0.656 |
| VPS37D      | 0.655 |
| AC127024.5  | 0.655 |
| DICER1-AS1  | 0.655 |
| AC073508.3  | 0.653 |
| ZNF607      | 0.653 |
| MAGEE1      | 0.653 |
| TBC1D13     | 0.651 |
| ILF3-DT     | 0.65  |
| TPCN1       | 0.65  |
| TSPAN7      | 0.65  |
| EXOC3-AS1   | 0.65  |
| SNRPN       | 0.649 |
| ROGDI       | 0.649 |
| CKMT2-AS1   | 0.649 |
| MIPEPP3     | 0.649 |
| FLJ37453    | 0.648 |
| PEBP1       | 0.647 |
| BEX4        | 0.646 |
| P4HTM       | 0.646 |
| SLC25A14    | 0.646 |
| AL109811.3  | 0.646 |
| AC073857.1  | 0.646 |
| GPRASP1     | 0.645 |
| HNF1A-AS1   | 0.642 |
| IKZF4       | 0.642 |
| MKS1        | 0.641 |
| FMC1        | 0.639 |
| RTN4RL1     | 0.639 |
| ERP29       | 0.638 |
| REC8        | 0.638 |
| RPAIN       | 0.638 |
| GS1-124K5.4 | 0.638 |

|            |       |
|------------|-------|
| SLC38A10   | 0.637 |
| CASKIN2    | 0.637 |
| TSPYL2     | 0.636 |
| AC004656.1 | 0.636 |
| MAN1B1-DT  | 0.636 |
| ISYNA1     | 0.635 |
| ANGEL1     | 0.635 |
| GKAP1      | 0.635 |
| TUBG2      | 0.634 |
| APOH       | 0.634 |
| USP20      | 0.633 |
| METTL16    | 0.633 |
| IRF2BP1    | 0.632 |
| ATP6V0E2   | 0.632 |
| HEXDC      | 0.632 |
| ZC3H10     | 0.632 |
| ECHDC2     | 0.631 |
| PNPLA7     | 0.631 |
| VAMP2      | 0.63  |
| TMEM44-AS1 | 0.63  |
| ZNF446     | 0.63  |
| AC068473.5 | 0.63  |
| OCRL       | 0.629 |
| ZNF542P    | 0.629 |
| APH1B      | 0.628 |
| LINC00526  | 0.628 |
| EID2B      | 0.628 |
| ELAC1      | 0.627 |
| CYB5D2     | 0.626 |
| TMEM198    | 0.626 |
| ZNF671     | 0.626 |
| ZMAT1      | 0.626 |
| SCGB2A1    | 0.625 |
| KIAA0895L  | 0.625 |
| TRO        | 0.625 |
| POMT2      | 0.624 |
| CBX7       | 0.623 |
| AC005041.1 | 0.622 |
| TRAM1L1    | 0.622 |
| TCEAL3     | 0.621 |
| ABHD8      | 0.621 |
| ZNF853     | 0.621 |
| RAB26      | 0.621 |
| KRBA1      | 0.62  |
| TCEAL2     | 0.619 |
| DNAJC30    | 0.618 |
| SNPH       | 0.618 |
| ZNF780B    | 0.617 |
| AC027644.3 | 0.617 |
| PLXNB1     | 0.616 |
| ZNF414     | 0.616 |
| MAP3K12    | 0.616 |
| NAA38      | 0.615 |
| TNS2       | 0.615 |
| BCAT2      | 0.615 |
| AC125257.1 | 0.615 |
| PPFIA3     | 0.615 |
| RANBP3     | 0.614 |

|            |        |
|------------|--------|
| RAI2       | 0.614  |
| APLP1      | 0.614  |
| AJM1       | 0.614  |
| DLG4       | 0.613  |
| ZNF516     | 0.613  |
| CRYBA2     | 0.613  |
| AC006449.6 | 0.613  |
| BAHCC1     | 0.612  |
| CNNM3-DT   | 0.612  |
| ARMCX4     | 0.612  |
| WDR6       | 0.611  |
| BAHD1      | 0.611  |
| MOAP1      | 0.61   |
| RFX1       | 0.61   |
| FXYD2      | 0.61   |
| CCDC57     | 0.61   |
| C19orf44   | 0.61   |
| LYRM9      | 0.61   |
| TMEM86B    | 0.609  |
| SRRM3      | 0.609  |
| ABCA5      | 0.608  |
| ZSCAN30    | 0.608  |
| SDR39U1    | 0.607  |
| C17orf100  | 0.607  |
| AC006001.3 | 0.607  |
| PELI3      | 0.606  |
| UBOX5      | 0.606  |
| FUT8       | -0.346 |
| OGFOD1     | -0.346 |
| GINS1      | -0.346 |
| STIL       | -0.346 |
| MTPN       | -0.347 |
| KDELR3     | -0.347 |
| HEATR1     | -0.347 |
| OIP5       | -0.347 |
| PPIC       | -0.348 |
| CAB39      | -0.348 |
| TAGLN2     | -0.349 |
| SUMO3      | -0.349 |
| ADAM9      | -0.349 |
| MPZL1      | -0.35  |
| S100A16    | -0.351 |
| CNN2       | -0.351 |
| TFG        | -0.351 |
| MET        | -0.351 |
| PAK2       | -0.351 |
| PELI1      | -0.351 |
| GPX8       | -0.351 |
| ANLN       | -0.351 |
| ERI1       | -0.351 |
| TMEM87A    | -0.352 |
| PRPF40A    | -0.352 |
| TMOD3      | -0.352 |
| RPE        | -0.352 |
| MCM6       | -0.352 |
| KIF18B     | -0.352 |
| PTTG1      | -0.353 |
| ARCN1      | -0.354 |

|           |        |
|-----------|--------|
| ITGA6     | -0.354 |
| WDFY1     | -0.354 |
| SLC2A10   | -0.354 |
| CGAS      | -0.354 |
| BAK1      | -0.355 |
| PTMAP4    | -0.355 |
| MYL12A    | -0.356 |
| ZDHHC5    | -0.356 |
| KCMF1     | -0.356 |
| EIF5A2    | -0.356 |
| CTNNA1    | -0.357 |
| EIF2S3    | -0.357 |
| OSTF1     | -0.357 |
| MTDH      | -0.357 |
| ACTB      | -0.358 |
| PRDX1     | -0.358 |
| PARN      | -0.358 |
| NFE2L3    | -0.358 |
| VDR       | -0.358 |
| FGD6      | -0.358 |
| KIFC1     | -0.358 |
| C3orf52   | -0.358 |
| ARHGAP11A | -0.358 |
| OSTC      | -0.359 |
| SDCBP     | -0.359 |
| PSMD7     | -0.359 |
| MTFR1     | -0.359 |
| TMC7      | -0.359 |
| CFL1      | -0.36  |
| CHMP2B    | -0.36  |
| NMI       | -0.36  |
| MELK      | -0.36  |
| ARF6      | -0.361 |
| SERP1     | -0.361 |
| TMA16     | -0.361 |
| NLN       | -0.361 |
| TRIM59    | -0.361 |
| ELOVL1    | -0.362 |
| IQGAP1    | -0.362 |
| CKS2      | -0.362 |
| TES       | -0.363 |
| LGALS3    | -0.364 |
| ARF4      | -0.365 |
| B3GNT2    | -0.365 |
| RNASEH1   | -0.365 |
| CENPU     | -0.366 |
| PCLAF     | -0.366 |
| CDC6      | -0.366 |
| BAZ1A     | -0.367 |
| MCM4      | -0.367 |
| PMM2      | -0.367 |
| MRPL3     | -0.369 |
| C11orf24  | -0.369 |
| TNFRSF10A | -0.369 |
| UHRF1     | -0.369 |
| TUBB      | -0.37  |
| VPS35     | -0.37  |
| INCENP    | -0.37  |

|            |        |
|------------|--------|
| RAD51      | -0.371 |
| KIF20B     | -0.371 |
| AC099850.3 | -0.372 |
| S100A11    | -0.373 |
| SH3KBP1    | -0.373 |
| MTHFD1     | -0.373 |
| LMNB1      | -0.374 |
| CDR2       | -0.375 |
| GALNT10    | -0.375 |
| TPX2       | -0.375 |
| BZW2       | -0.377 |
| PGM2       | -0.377 |
| RACGAP1    | -0.377 |
| KIF20A     | -0.377 |
| SNAP23     | -0.379 |
| NMD3       | -0.38  |
| SMC4       | -0.38  |
| SLC16A1    | -0.381 |
| RMI2       | -0.381 |
| NCAPH      | -0.381 |
| PRIM2      | -0.382 |
| CCNB2      | -0.383 |
| CCNA2      | -0.383 |
| ANXA2      | -0.384 |
| ACTR2      | -0.384 |
| EIF2S1     | -0.384 |
| NDE1       | -0.384 |
| PLK1       | -0.385 |
| HDLBP      | -0.386 |
| ZDHHC9     | -0.387 |
| AGPS       | -0.387 |
| MKI67      | -0.387 |
| LDHA       | -0.388 |
| SSR3       | -0.388 |
| FAM114A1   | -0.389 |
| PRR11      | -0.389 |
| MYOF       | -0.39  |
| KPNA4      | -0.39  |
| ASPH       | -0.39  |
| GSPT1      | -0.391 |
| ZWINT      | -0.391 |
| DLGAP5     | -0.391 |
| CENPN      | -0.391 |
| SHCBP1     | -0.391 |
| ASF1B      | -0.392 |
| CIP2A      | -0.392 |
| PLEK2      | -0.394 |
| PANX1      | -0.394 |
| PPIAP22    | -0.395 |
| ANXA3      | -0.395 |
| MYO1E      | -0.396 |
| HNRNPF     | -0.397 |
| GNAI3      | -0.397 |
| PALB2      | -0.397 |
| PLS3       | -0.398 |
| DESI2      | -0.398 |
| CAP1       | -0.399 |
| MOB1A      | -0.399 |

|          |        |
|----------|--------|
| CDK1     | -0.399 |
| OSBPL3   | -0.4   |
| KIF23    | -0.4   |
| ZNF267   | -0.401 |
| ZWILCH   | -0.401 |
| HMMR     | -0.401 |
| TPM3     | -0.403 |
| TSKU     | -0.403 |
| RNF149   | -0.403 |
| TUBA1C   | -0.403 |
| NRAS     | -0.403 |
| HJURP    | -0.403 |
| BUB1B    | -0.403 |
| NEK2     | -0.404 |
| NUF2     | -0.404 |
| FAM111B  | -0.407 |
| RRM2     | -0.409 |
| ACOT9    | -0.41  |
| CENPF    | -0.41  |
| RALB     | -0.412 |
| DDX18    | -0.412 |
| CALU     | -0.414 |
| DTL      | -0.414 |
| ASPM     | -0.414 |
| BUB1     | -0.415 |
| ELF4     | -0.416 |
| ARPC2    | -0.418 |
| ACTL6A   | -0.418 |
| CASP4    | -0.418 |
| NIP7     | -0.418 |
| NAA50    | -0.419 |
| SLC44A1  | -0.421 |
| MTHFD2   | -0.421 |
| KIF11    | -0.421 |
| PTMA     | -0.423 |
| AP3S1    | -0.423 |
| CBX3     | -0.424 |
| PATL1    | -0.426 |
| SIAH2    | -0.427 |
| PDCD10   | -0.43  |
| BFAR     | -0.432 |
| GTF2E2   | -0.432 |
| SLC25A43 | -0.432 |
| LACTB    | -0.433 |
| YWHAZ    | -0.434 |
| CAPZA1   | -0.435 |
| TOP2A    | -0.44  |
| TPM4     | -0.441 |
| CEP55    | -0.442 |
| ECT2     | -0.444 |
| NUSAP1   | -0.452 |
| ACTR3    | -0.454 |
| NRBF2    | -0.463 |
